# Supplementary material
Source: Springer Nature journal article supplement (https://www.springerprofessional.de/resource/supplementary/13638_2013_742_MOESM1_ESM.pdf/11898374)

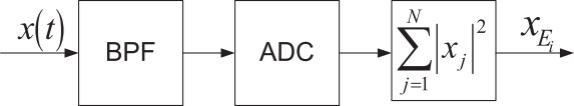

$x(t)$

BPF

ADC

$$\sum_{j=1}^N |x_j|^2$$

$x_E$

Supplement: MOESM1 [file 11898374]
